# Supplementary material
Source: Springer Nature journal article supplement (https://www.springermedizin.de/resource/supplementary/13048_2012_113_MOESM6_ESM.pdf/9664938)

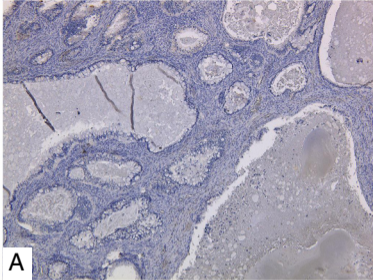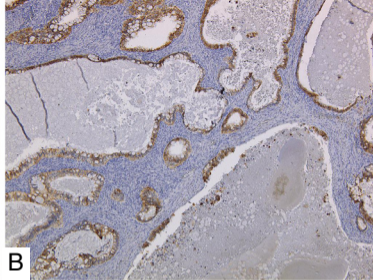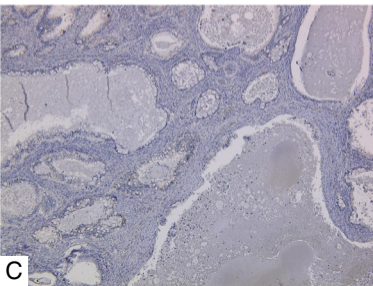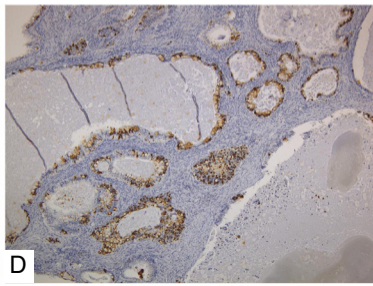

Supplement: MOESM6 [file 9664938]
